# Supplementary material
Source: PubMed Central journal article supplement (PMC9161795)
Supplement: ASN.2021121642SupplementaryData.pdf [file ASN.2021121642SupplementaryData.pdf]

## **Supplementary Material:**

### **TABLE OF CONTENTS**

Supplemental Figure 1. Proportion of patients with functional status over a 36-month follow up period

Supplemental Figure 2. Proportion of patients on hemodialysis and peritoneal dialysis over a 36-month follow up period.

Supplemental Figure 3. Proportion of patients using different dialysis access over a 36-month follow up period.

Supplemental Figure 4. Median daily dose of cyclosporine, tacrolimus, mycophenolate mofetil and azathioprine.

Supplemental Figure 5. Temporal change in PRA for those with PRA > 20% at baseline and discontinued all immunosuppressants. (A) PRA class I; (B) PRA class II.

Supplemental Figure 6. Temporal change in PRA for those with PRA < 20% at baseline and discontinued all immunosuppressants. (A) PRA class I; (B) PRA class II.

Supplemental Figure 7. Temporal change in PRA for those with PRA > 20% at baseline and discontinued all immunosuppressants except low-dose prednisone. (A) PRA class I; (B) PRA class II.

Supplemental Figure 8. Temporal change in PRA for those with PRA < 20% at baseline and discontinued all immunosuppressants except low-dose prednisone. (A) PRA class I; (B) PRA class II.

Table S1. Study recruitment by center

Table S2: Baseline characteristics by immunosuppressant prescription during follow-up

Table S3. Cox multivariable model for the outcome of death

**Table S1: Study recruitment by centre**

|                            | Screened   | Qualified  | Consented and Enrolled |
|----------------------------|------------|------------|------------------------|
| 1 - Ottawa                 | 47         | 36         | 21                     |
| 2 - London                 | 42         | 33         | 31                     |
| 3 - Saskatoon              | 33         | 28         | 14                     |
| 4 - St. Michael's          | 120        | 87         | 34                     |
| 5 - St. Paul's BC          | 99         | 84         | 40                     |
| 6 - Calgary                | 34         | 25         | 9                      |
| 7 - Winnipeg               | 5          | 4          | 4                      |
| 8 - Edmonton               | 40         | 31         | 18                     |
| 9 - Hamilton               | 12         | 21         | 10                     |
| 10 - UHN                   | 113        | 64         | 23                     |
| 11 - Kingston              | 50         | 12         | 5                      |
| 12 - VGH                   | 60         | 53         | 17                     |
| 13 - CHUM                  | 40         | 31         | 9                      |
| 14 - CHUQ, Quebec          | 36         | 29         | 13                     |
| 15 - Maisonneuve-Rosemount | 18         | 13         | 10                     |
| 16- MUHC                   | 40         | 29         | 11                     |
| <b>Totals</b>              | <b>789</b> | <b>580</b> | <b>269</b>             |

**Table S2: Baseline characteristics by immunosuppressant prescription during follow-up**

|                                                                           | <b>Continued immunosuppressants other than prednisone alone (n=174)</b> | <b>Continued prednisone only (n=54)</b> | <b>Discontinued all immunosuppressants (n=41)</b> |
|---------------------------------------------------------------------------|-------------------------------------------------------------------------|-----------------------------------------|---------------------------------------------------|
| <b>Mean age (SD)</b>                                                      | 51.9 (15.5)                                                             | 54.4 (13.9)                             | 47.9 (16.5)                                       |
| <b>Male, n (%)</b>                                                        | 116 (66.7)                                                              | 31 (57.4)                               | 23 (56.1)                                         |
| <b>Race, n (%)</b>                                                        |                                                                         |                                         |                                                   |
| White                                                                     | 107 (61.5)                                                              | 32 (59.3)                               | 28 (68.3)                                         |
| Asian                                                                     | 14 (8.0)                                                                | 7 (13.0)                                | 4 (9.8)                                           |
| Black                                                                     | 17 (9.8)                                                                | 6 (11.1)                                | 2 (4.9)                                           |
| Other                                                                     | 16 (9.2)                                                                | 2 (3.7)                                 | 5 (12.2)                                          |
| Indian sub-continent                                                      | 11 (6.3)                                                                | 5 (9.3)                                 | -                                                 |
| Aboriginal                                                                | 9 (5.2)                                                                 | 2 (3.7)                                 | 2 (4.9)                                           |
| <b>Donor source, n (%)</b>                                                |                                                                         |                                         |                                                   |
| Deceased                                                                  | 119 (68.4)                                                              | 43 (79.6)                               | 29 (70.7)                                         |
| Living                                                                    | 55 (31.6)                                                               | 11 (20.4)                               | 12 (29.3)                                         |
| <b>Duration of allograft survival before transplant failed</b>            |                                                                         |                                         |                                                   |
| Median (IQR), years                                                       | 10.9 (5.1 to 16.1)                                                      | 9.9 (5.9 to 14.8)                       | 10.9 (2.6 to 16.2)                                |
| <b>Transplant duration</b>                                                |                                                                         |                                         |                                                   |
| < 1 year                                                                  | 10 (5.7)                                                                | -                                       | 5 (12.2)                                          |
| > 1 year                                                                  | 164 (94.3)                                                              | 54 (100)                                | 36 (87.8)                                         |
| <b>Transplant year</b>                                                    |                                                                         |                                         |                                                   |
| Before 1990                                                               | 10(5.7)                                                                 | 3 (5.6)                                 | 3 (7.3)                                           |
| 1990-2000                                                                 | 62(35.6)                                                                | 16 (29.6)                               | 14 (34.1)                                         |
| 2001-2010                                                                 | 78(44.8)                                                                | 30 (55.6)                               | 18 (43.9)                                         |
| 2011-2016                                                                 | 24(13.8)                                                                | 5 (9.3)                                 | 6 (14.6)                                          |
| <b>Primary cause of allograft failure, n (%)</b>                          |                                                                         |                                         |                                                   |
| Interstitial fibrosis and tubular atrophy (chronic allograft nephropathy) | 46 (26.4)                                                               | 18 (33.3)                               | 9 (22.0)                                          |
| Other                                                                     | 36 (20.7)                                                               | 8 (14.8)                                | 7 (17.1)                                          |
| Chronic antibody mediated rejection/transplant glomerulopathy             | 35 (20.1)                                                               | 10 (18.5)                               | 4 (9.8)                                           |
| Recurrent Glomerulonephritis                                              | 18 (10.3)                                                               | 4 (7.4)                                 | 2 (4.9)                                           |

|                                                                                |            |           |           |
|--------------------------------------------------------------------------------|------------|-----------|-----------|
| Acute T-cell mediated rejection                                                | 16 (9.2)   | 2 (3.7)   | 5 (12.2)  |
| Unknown                                                                        | 9 (5.2)    | 4 (7.4)   | 3 (7.3)   |
| Primary non-function                                                           | 4 (2.3)    | 2 (3.7)   | 2 (4.9)   |
| Acute antibody mediated rejection                                              | 3 (1.7)    | -         | 4 (9.8)   |
| Polyoma nephropathy                                                            | -          | 4 (7.4)   | 2 (4.9)   |
| Calcineurin inhibitor toxicity                                                 | 3 (1.7)    | 1 (1.9)   | -         |
| Arterial or venous thrombosis                                                  | 1 (0.6)    | -         | 2 (4.9)   |
| De novo Glomerulonephritis                                                     | 2 (1.1)    | -         | 1 (2.4)   |
| Obstruction                                                                    | 1 (0.6)    | 1 (1.9)   | -         |
| <b>*Current immunosuppressive medications, n (%)</b>                           |            |           |           |
| Prednisone                                                                     | 154 (88.5) | 53 (98.1) | 26 (63.4) |
| Tacrolimus                                                                     | 106 (60.9) | 21 (38.9) | 15 (36.6) |
| Mycophenolate mofetil                                                          | 57 (32.8)  | 11 (20.4) | 8 (19.5)  |
| Cyclosporine                                                                   | 34 (19.5)  | 10 (18.5) | 9 (22.0)  |
| Mycophenolate sodium                                                           | 26 (14.9)  | 2 (3.7)   | 3 (7.3)   |
| Azathioprine                                                                   | 18 (10.3)  | 6 (11.1)  | 3 (7.3)   |
| Sirolimus                                                                      | 8 (4.6)    | 1 (1.9)   | 3 (7.3)   |
| Other                                                                          | 3 (1.7)    | -         | -         |
| <b>Treatment for acute rejection anytime prior to allograft failure, n (%)</b> |            |           |           |
| Yes                                                                            | 80 (46.0)  | 19 (35.2) | 17 (41.5) |
| No                                                                             | 68 (39.1)  | 22 (40.7) | 19 (46.3) |
| Unknown                                                                        | 26 (14.9)  | 13 (24.1) | 5 (12.2)  |
| <b>Co-Morbid Conditions, n (%)</b>                                             |            |           |           |
| Cancer                                                                         | 38 (21.8)  | 11 (20.4) | 9 (22.0)  |
| Cardiovascular disease                                                         | 50 (28.7)  | 15 (27.8) | 7 (17.1)  |
| Diabetes mellitus                                                              | 54 (31.0)  | 25 (46.3) | 8 (19.5)  |
| <b>Smoking, n (%)</b>                                                          |            |           |           |
| Current                                                                        | 26 (14.9)  | 6 (11.1)  | 7 (17.1)  |
| Former                                                                         | 50 (28.7)  | 18 (33.3) | 15 (36.6) |
| Never                                                                          | 98 (56.3)  | 30 (55.6) | 19 (46.3) |

| <b>Cause of end stage kidney disease, n (%)</b> |              |             |             |
|-------------------------------------------------|--------------|-------------|-------------|
| Other                                           | 69 (39.7)    | 15 (27.8)   | 11 (26.8)   |
| Glomerulonephritis                              | 47 (27.0)    | 17 (31.5)   | 17 (41.5)   |
| Diabetes mellitus                               | 25 (14.4)    | 10 (18.5)   | 3 (7.3)     |
| Polycystic kidney disease                       | 14 (8.0)     | 7 (13.0)    | 3 (7.3)     |
| Unknown                                         | 11 (6.3)     | 3 (5.6)     | 4 (9.8)     |
| Hypertension                                    | 8 (4.6)      | 2 (3.7)     | 3 (7.3)     |
| <b>Laboratory Parameters</b>                    |              |             |             |
| Hemoglobin, g/L                                 | 95.8 (16.6)  | 95.1 (17.6) | 96.2 (17.6) |
| PTH, pmol/L                                     | 69.9 (111.3) | 50.6 (58.8) | 65.5 (68.8) |
| Serum Albumin, g/L                              | 34 (5.5)     | 32.7 (5.6)  | 33.1 (6.7)  |
| Calcium (total uncorrected), mmol/L             | 2.2 (0.2)    | 2.2 (0.3)   | 2.1 (0.2)   |
| Phosphorus, mmol/L                              | 1.7 (0.6)    | 1.5 (0.5)   | 1.6 (0.5)   |

**Table S3. Cox multivariable model for the outcome of death**

|                                                                                                            | <b>Hazard Ratio (95% confidence interval)</b> |
|------------------------------------------------------------------------------------------------------------|-----------------------------------------------|
| Continued immunosuppression<br>(reference discontinued all immunosuppression or continued prednisone only) | 0.40 (0.17 -0.93)                             |
| Age (per year older)                                                                                       | 1.04 (1.01-1.06)                              |
| Diabetes (reference no diabetes)                                                                           | 2.22 (1.06 -4.64)                             |
| Time from transplantation to allograft failure                                                             | 1.00 (1.00-1.00)                              |

Figure S1: Proportion of patients with functional status over a 36-month follow up period

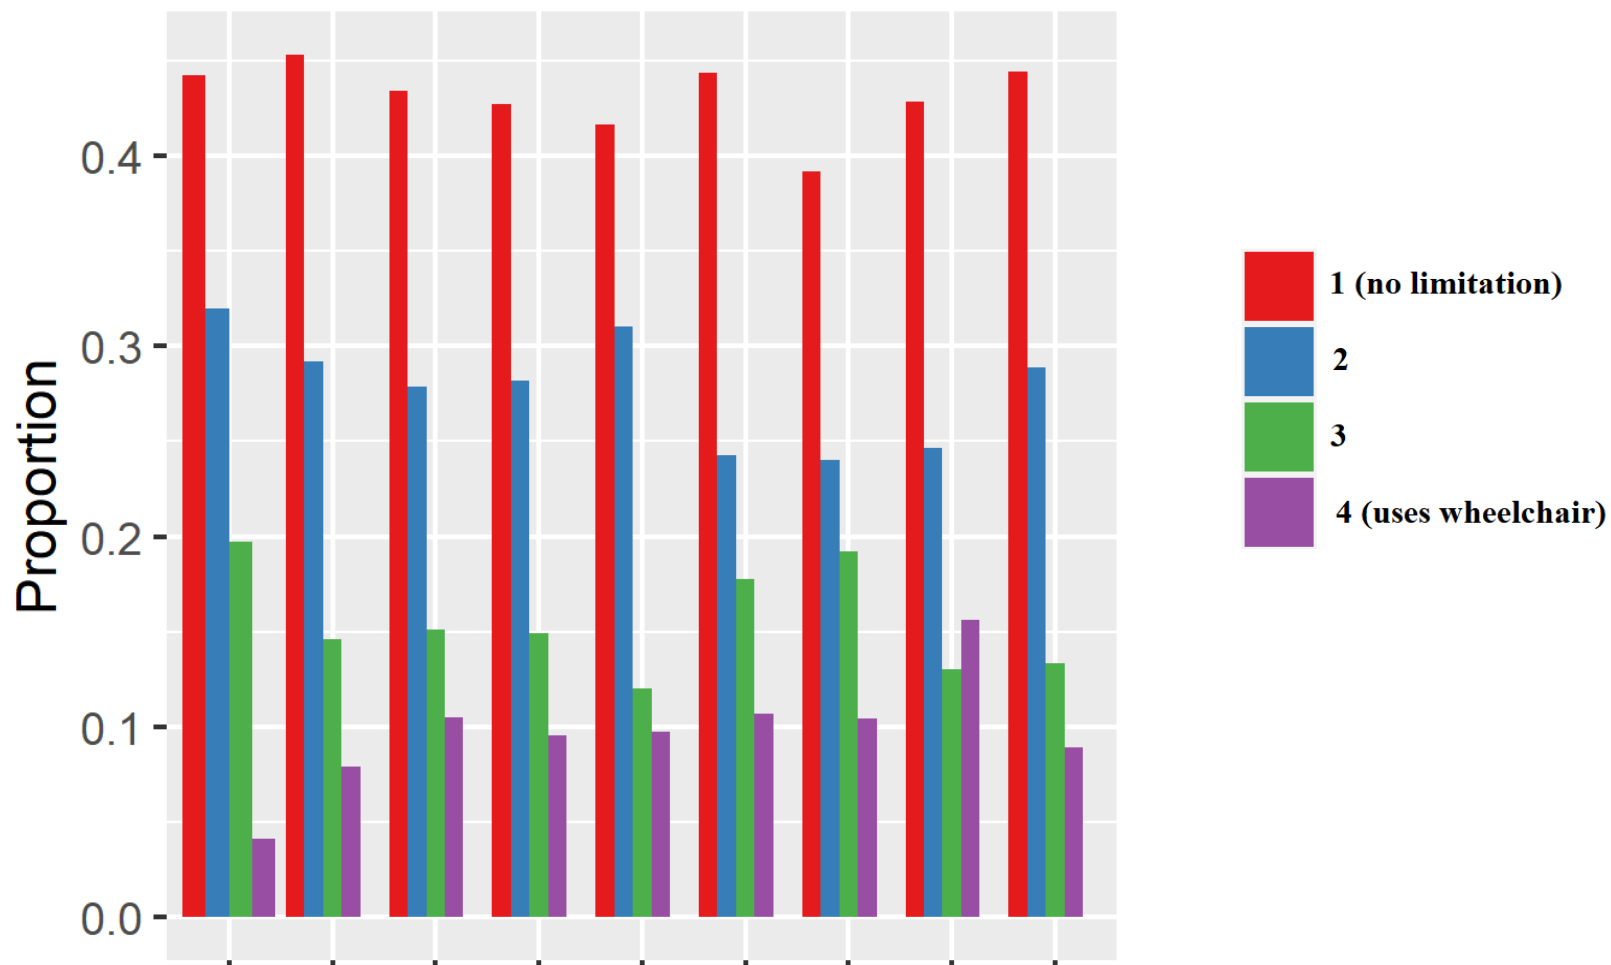

| Months | 0   | 1   | 3   | 6   | 12  | 18  | 24  | 30 | 36 |
|--------|-----|-----|-----|-----|-----|-----|-----|----|----|
| N†     | 269 | 267 | 258 | 241 | 216 | 169 | 125 | 77 | 45 |

† Represents the number of patients with functional status in the interval between follow-up periods and not exact dates.

Figure S2: Proportion of patients on hemodialysis and peritoneal dialysis over a 36-month follow up period

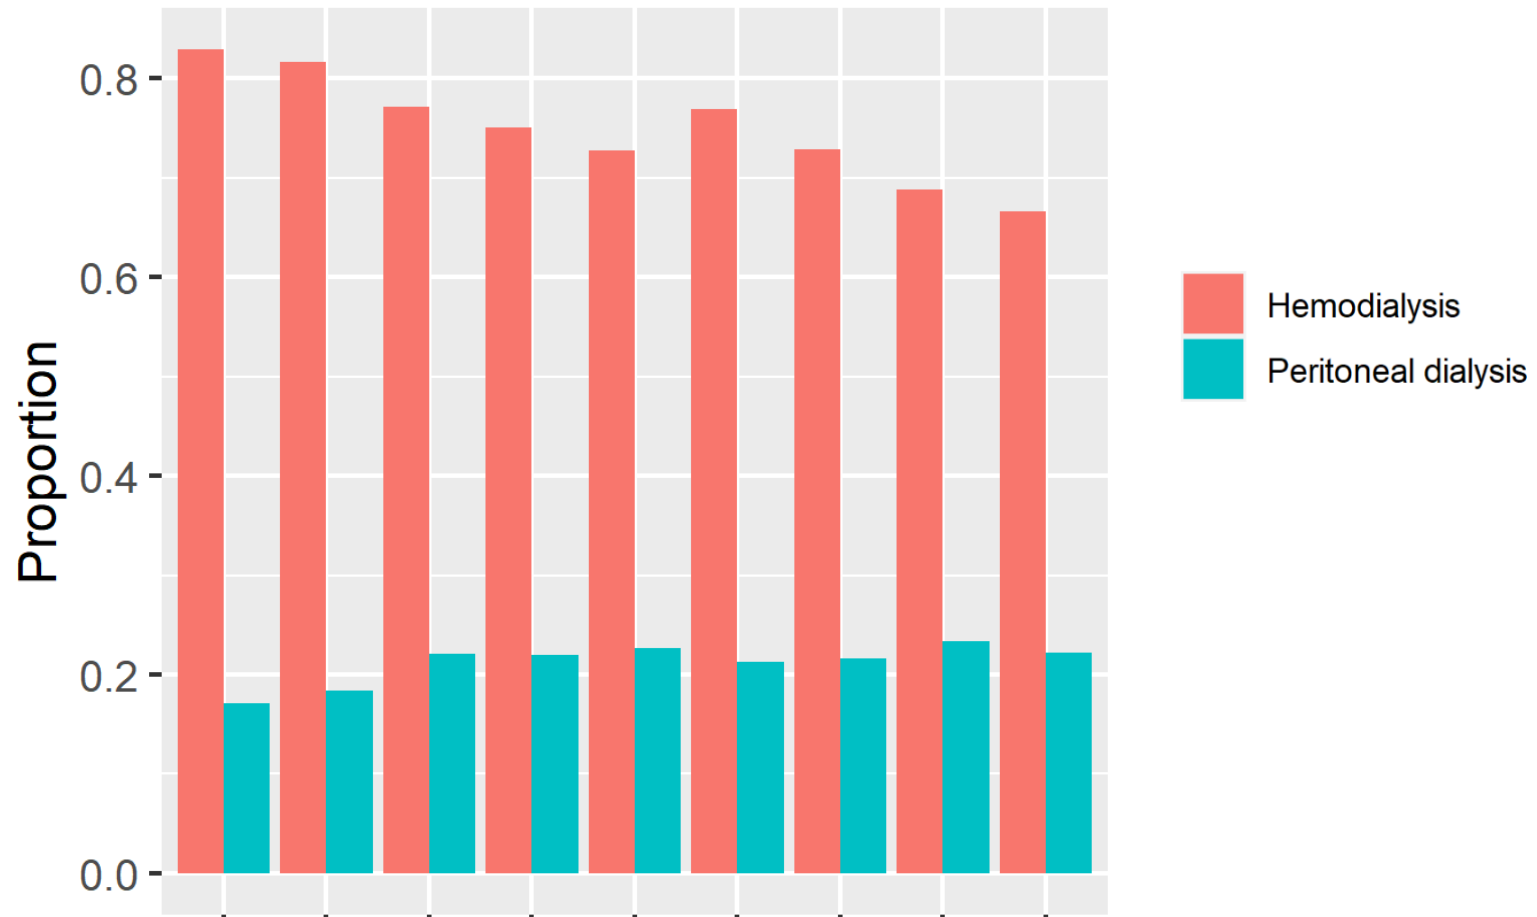

| Months         | 0   | 1   | 3   | 6   | 12  | 18  | 24  | 30 | 36 |
|----------------|-----|-----|-----|-----|-----|-----|-----|----|----|
| N <sup>†</sup> | 269 | 267 | 258 | 241 | 216 | 169 | 125 | 77 | 45 |

<sup>†</sup> Represents the number of patients on dialysis in the interval between follow-up periods and not exact dates.



Figure S3: Proportion of patients using different dialysis access over a 36-month follow up period

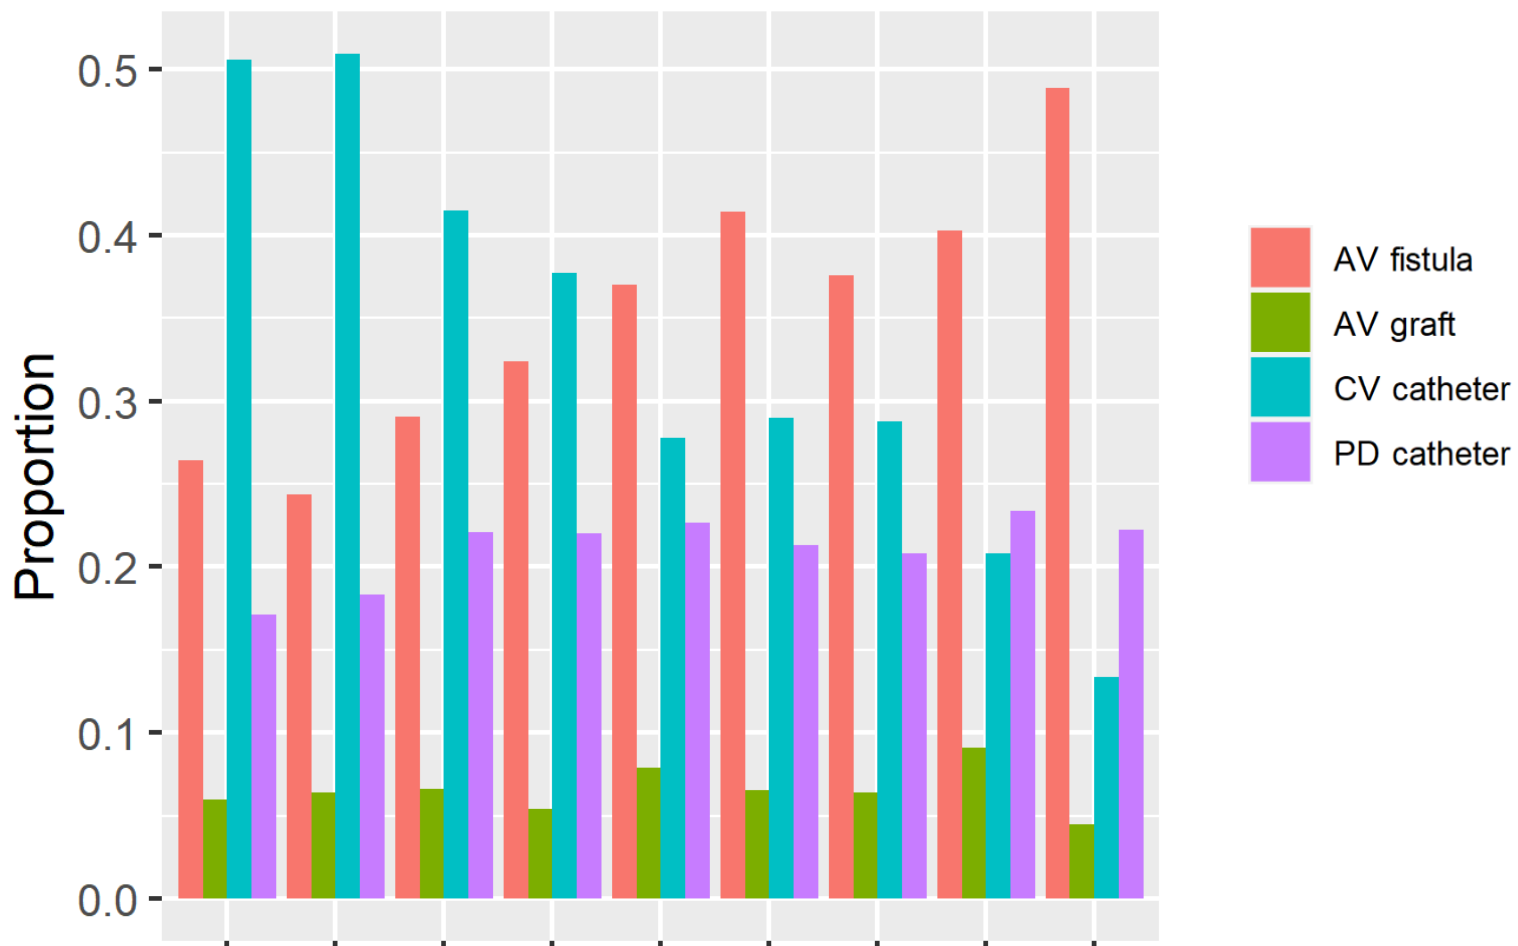

| Months | 0   | 1   | 3   | 6   | 12  | 18  | 24  | 30 | 36 |
|--------|-----|-----|-----|-----|-----|-----|-----|----|----|
| N†     | 269 | 267 | 258 | 241 | 216 | 169 | 125 | 77 | 45 |

† Represents the number of patients using different dialysis access in the interval between follow-up periods and not exact dates.

Figure S4. The median daily dose cyclosporine (panel S4A), tacrolimus (S4b), mycophenolate mofetil (S4c), mycophenolate sodium (S4d), azathioprine (S4e), and prednisone (s4f).

#### 4a. Cyclosporine

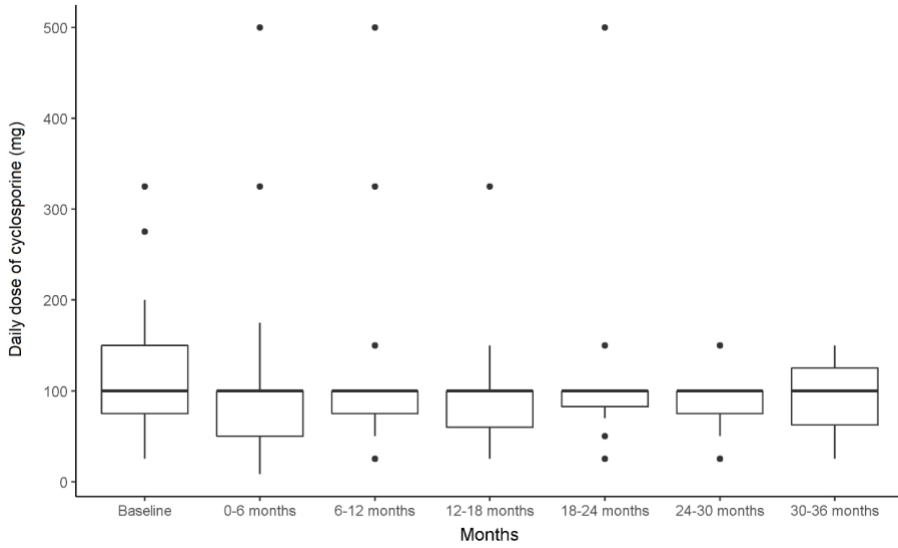

#### S4b. Tacrolimus

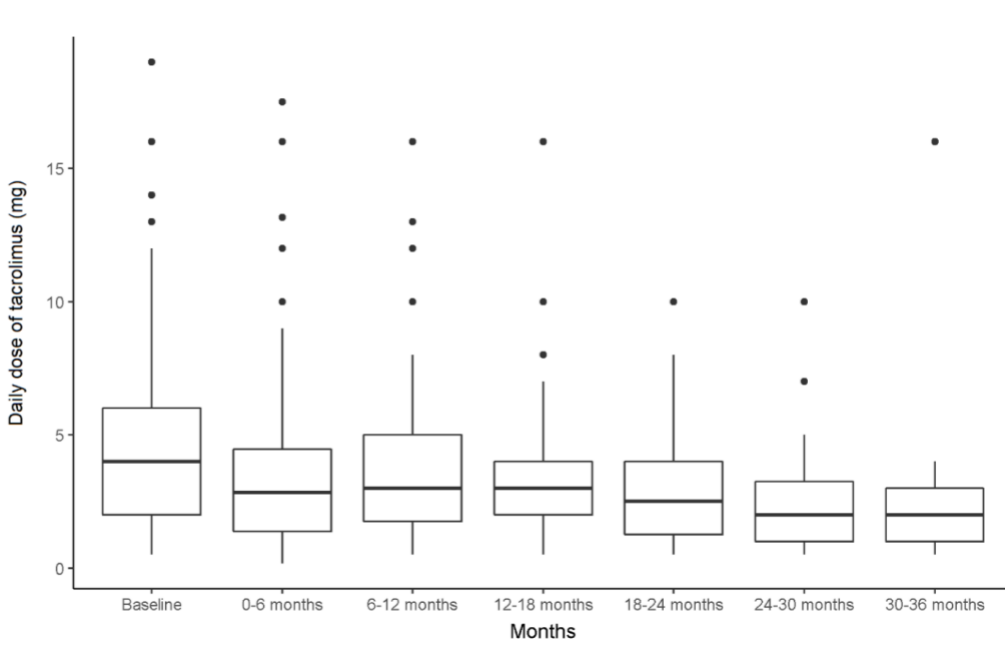

S4c. mycophenolate mofetil

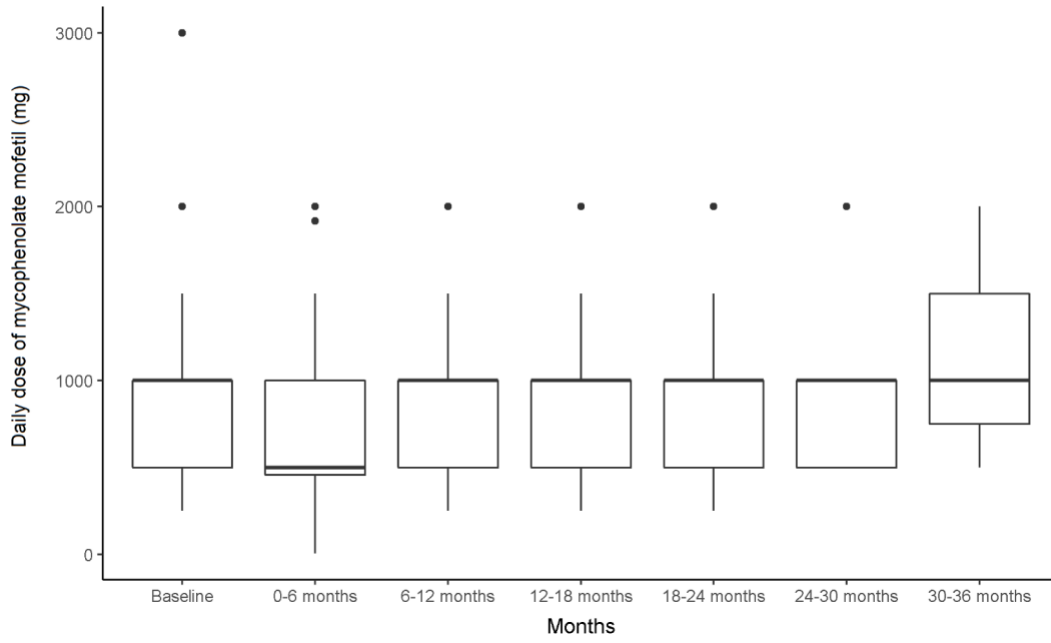

S4d. mycophenolate sodium

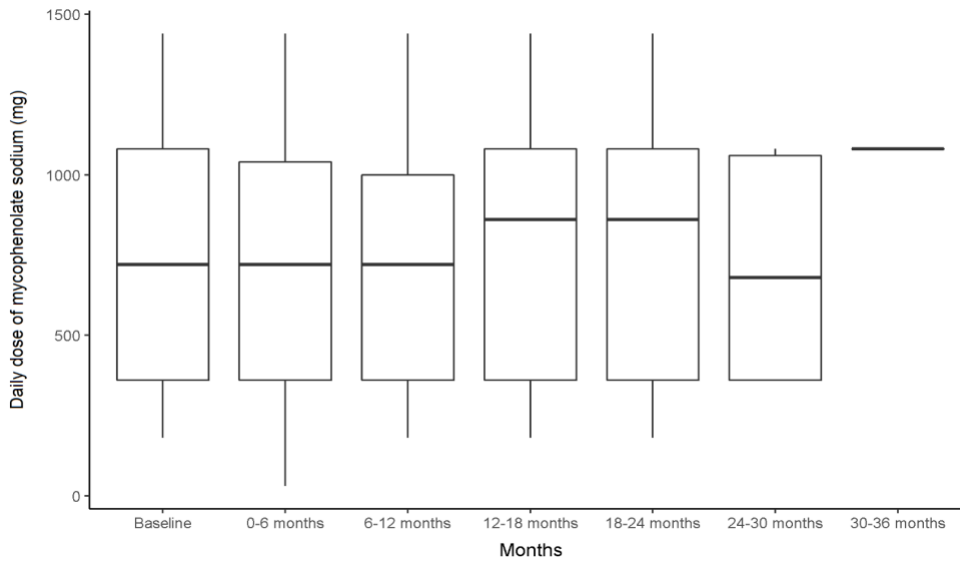

### S4e. azathioprine

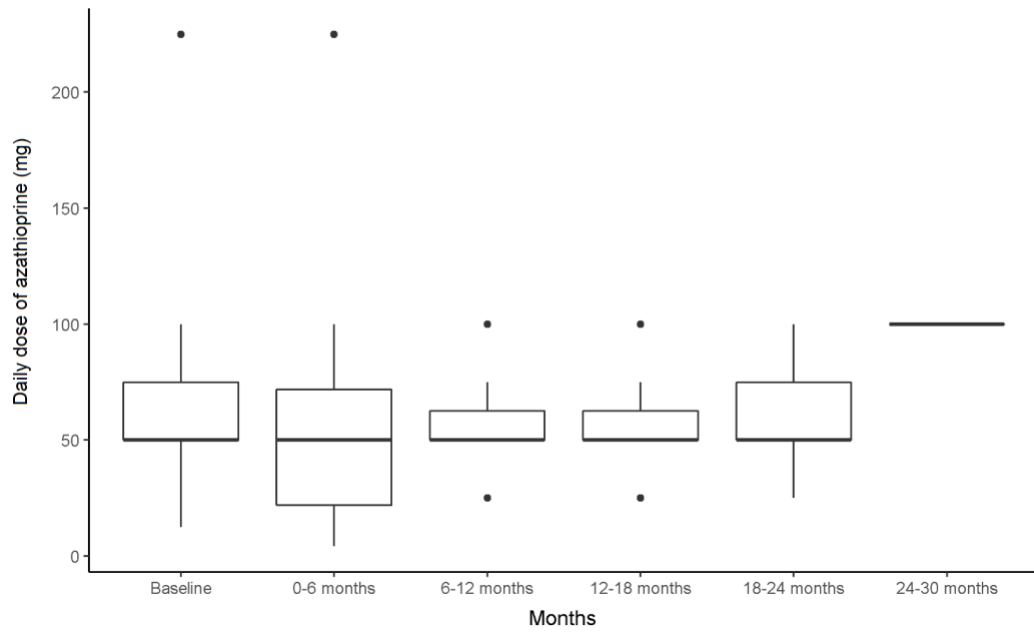

### S4f. prednisone

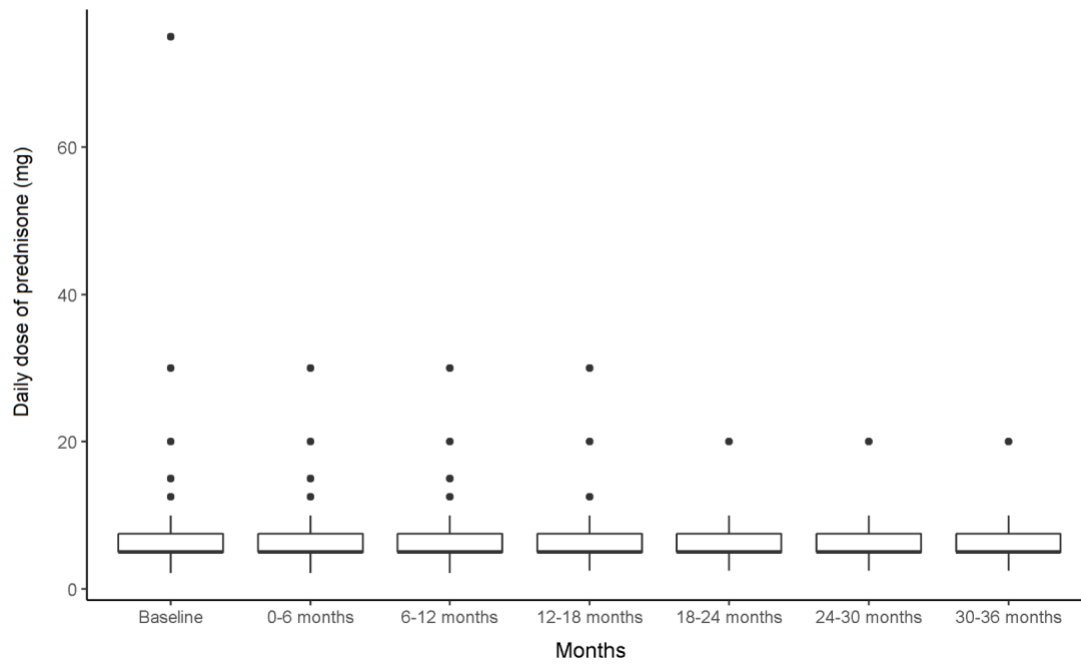

Figure S5- Temporal change in PRA for those with PRA > 20% at baseline and discontinued all immunosuppressants. (A) PRA class I; (B) PRA class II.

A)

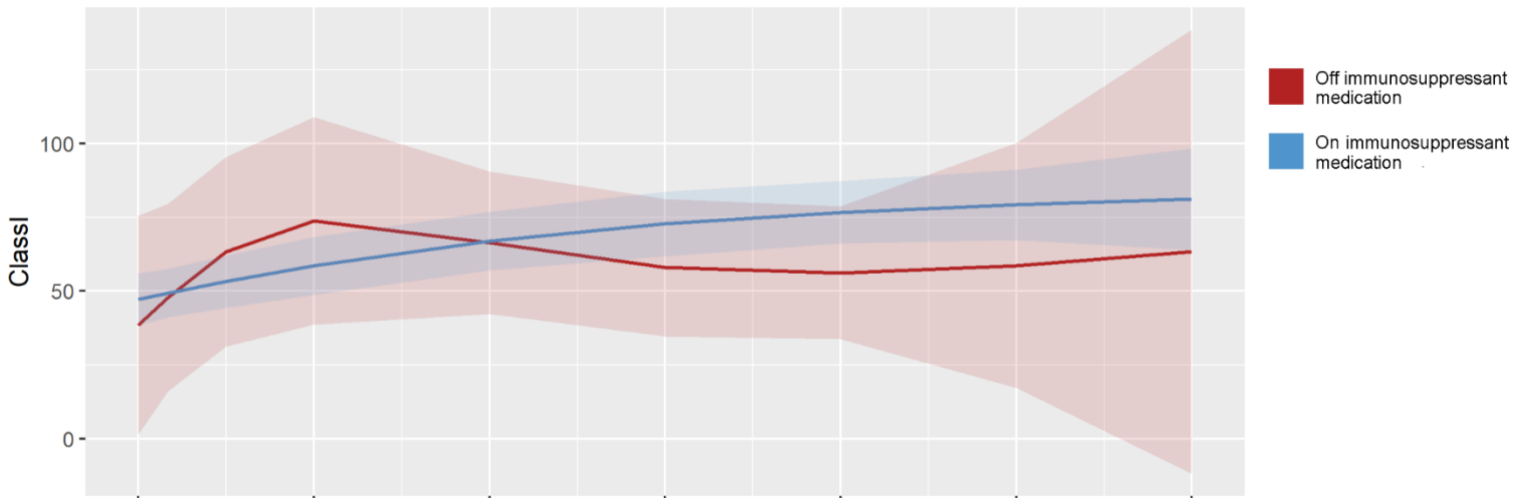

| Months | 0  | 6  | 12 | 18 | 24 | 30 | 36 |
|--------|----|----|----|----|----|----|----|
| N      | 49 | 25 | 16 | 14 | 15 | 8  | 5  |

B)

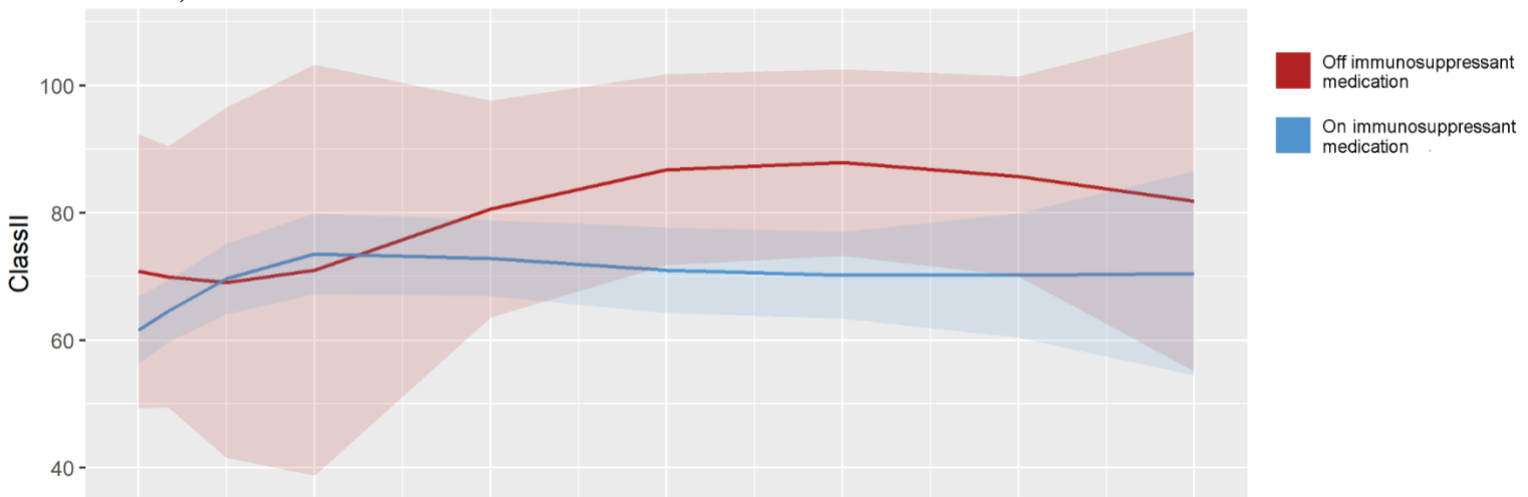

| Months | 0  | 6  | 12 | 18 | 24 | 30 | 36 |
|--------|----|----|----|----|----|----|----|
| N      | 99 | 44 | 35 | 34 | 24 | 11 | 6  |

**Figure S6- Temporal change in PRA for those with PRA < 20% at baseline and discontinued all immunosuppressants. (A) PRA class I; (B) PRA class II.**

**A)**

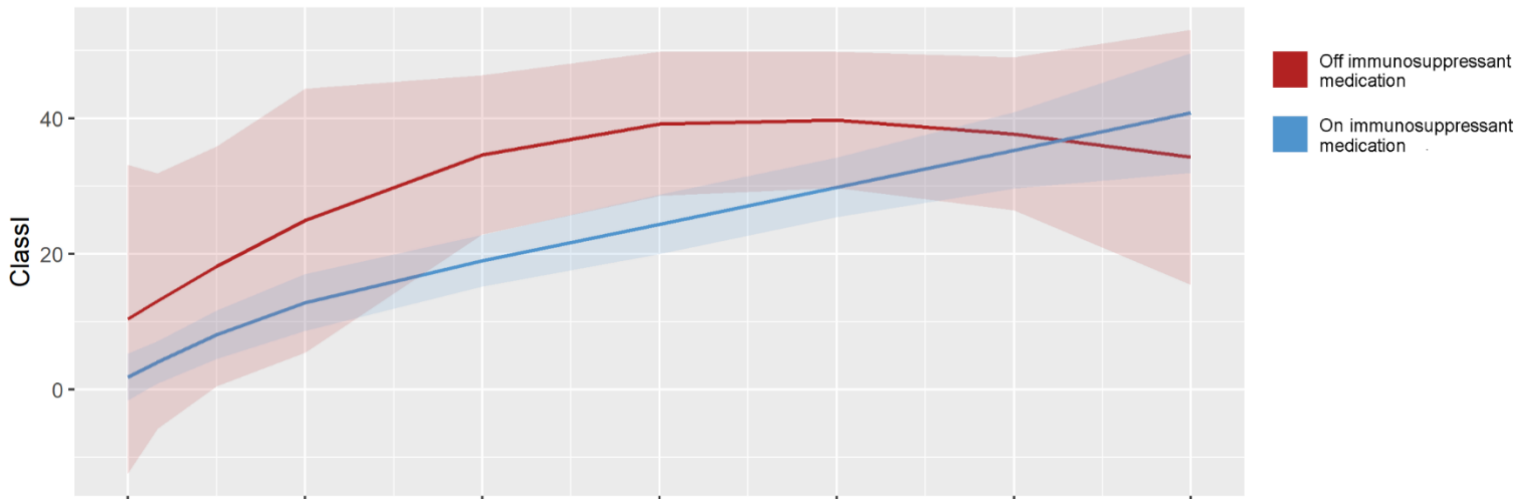

| Months | 0   | 6  | 12 | 18 | 24 | 30 | 36 |
|--------|-----|----|----|----|----|----|----|
| N      | 211 | 85 | 83 | 73 | 48 | 29 | 20 |

**B)**

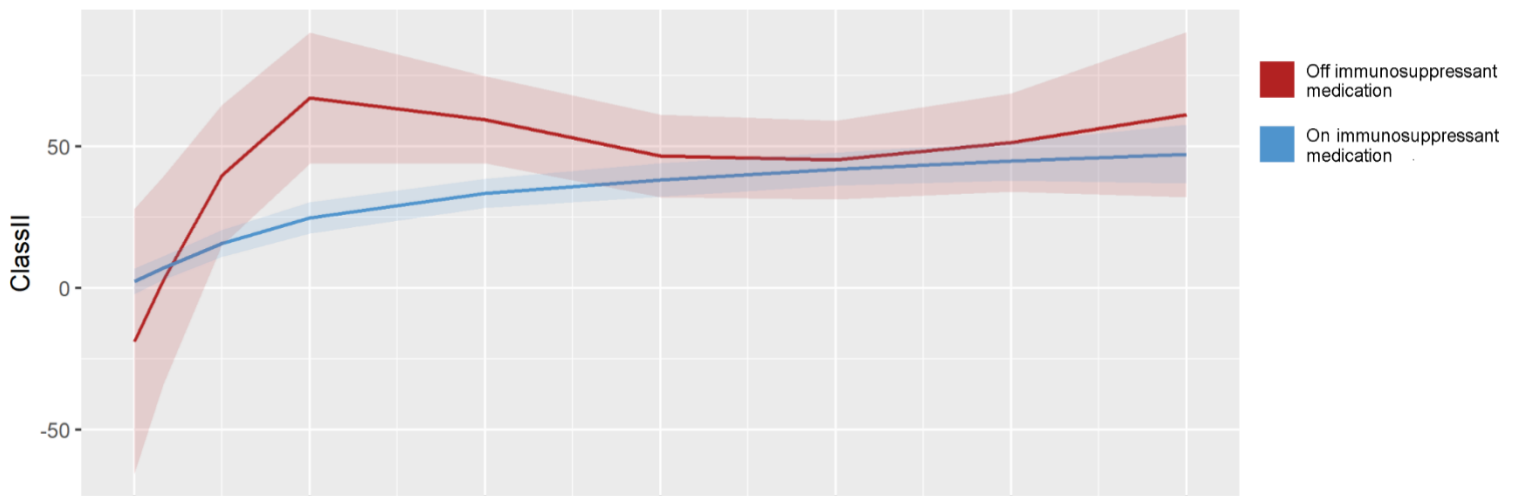

| Months | 0   | 6  | 12 | 18 | 24 | 30 | 36 |
|--------|-----|----|----|----|----|----|----|
| N      | 161 | 66 | 64 | 53 | 39 | 26 | 19 |

**Figure S7- Temporal change in PRA for those with PRA > 20% at baseline and discontinued all immunosuppressants except prednisone. (A) PRA class I; (B) PRA class II.**

**A)**

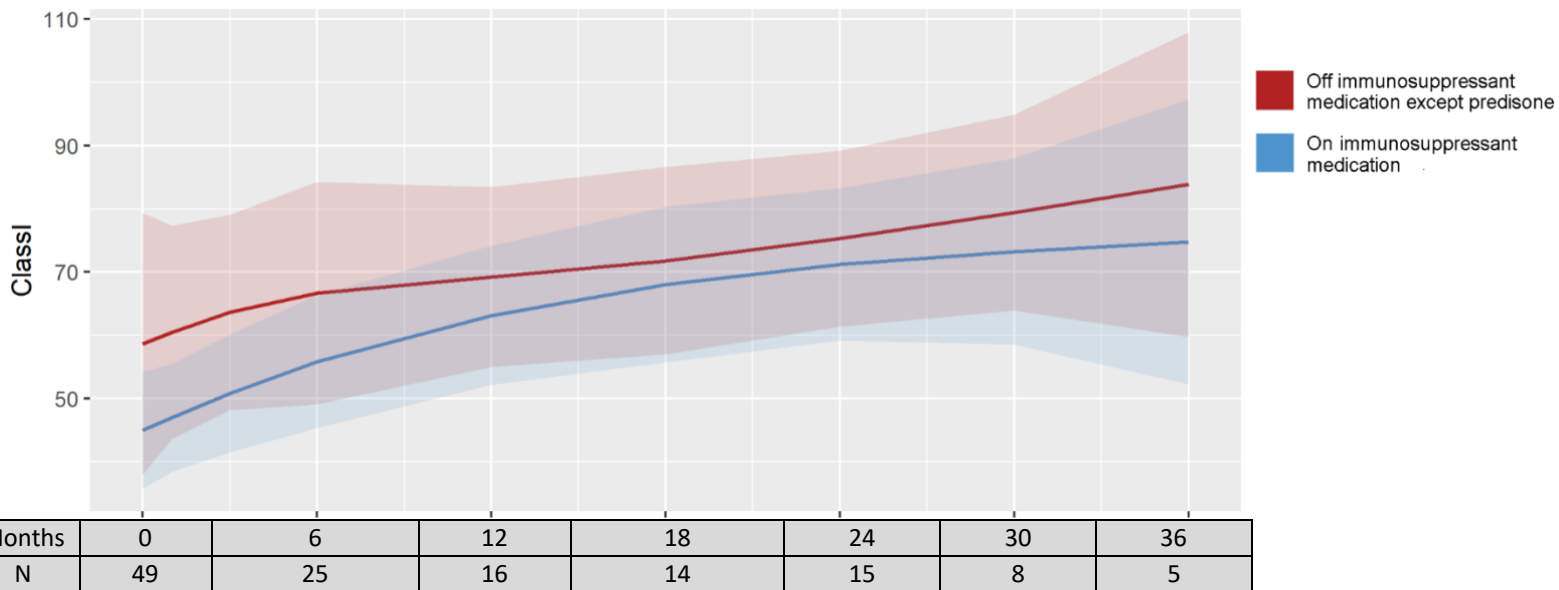

**B)**

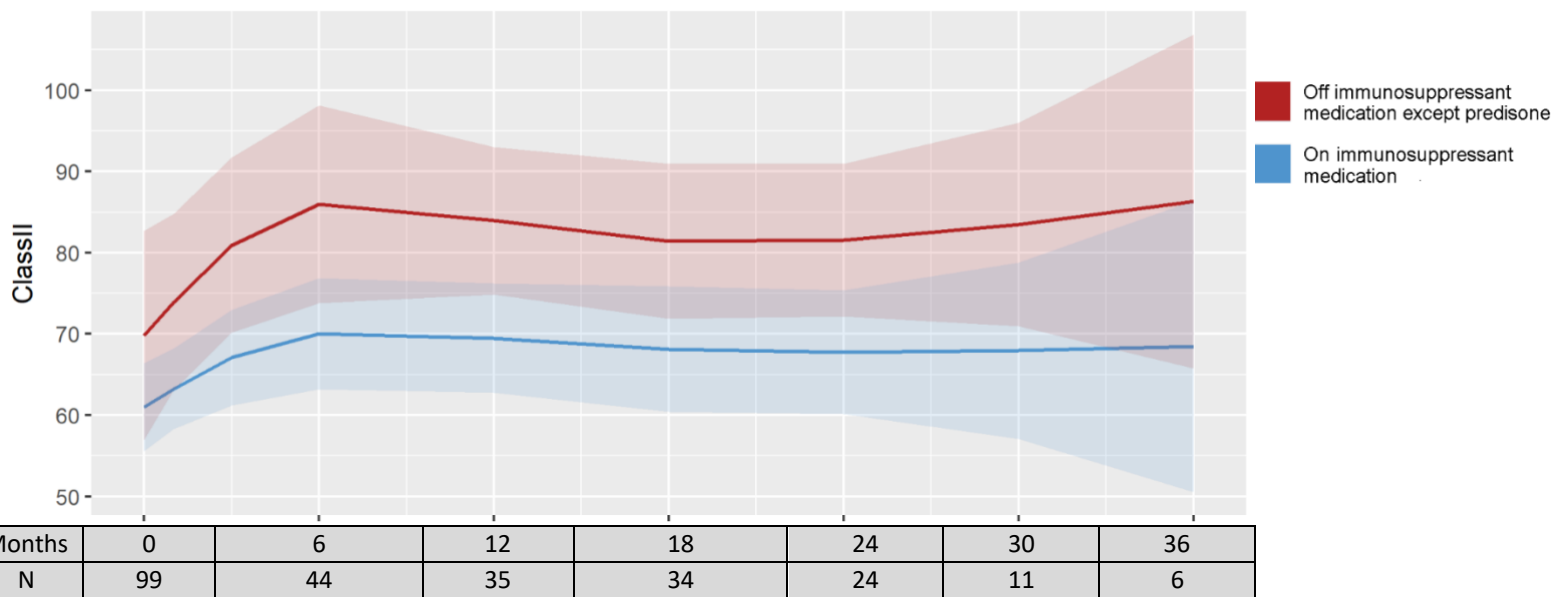

Figure S8- Temporal change in PRA for those with PRA < 20% at baseline and discontinued all immunosuppressants except prednisone. (A) PRA class I; (B) PRA class II.

A)

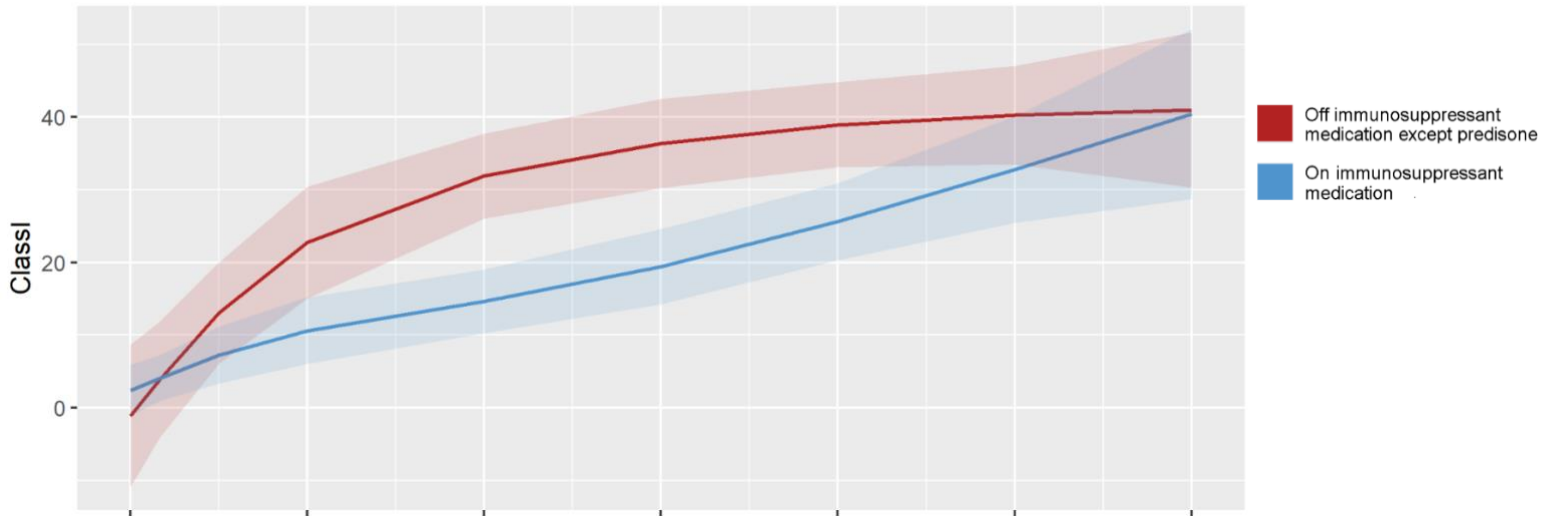

| Months | 0   | 6  | 12 | 18 | 24 | 30 | 36 |
|--------|-----|----|----|----|----|----|----|
| N      | 211 | 85 | 83 | 73 | 48 | 29 | 20 |

B)

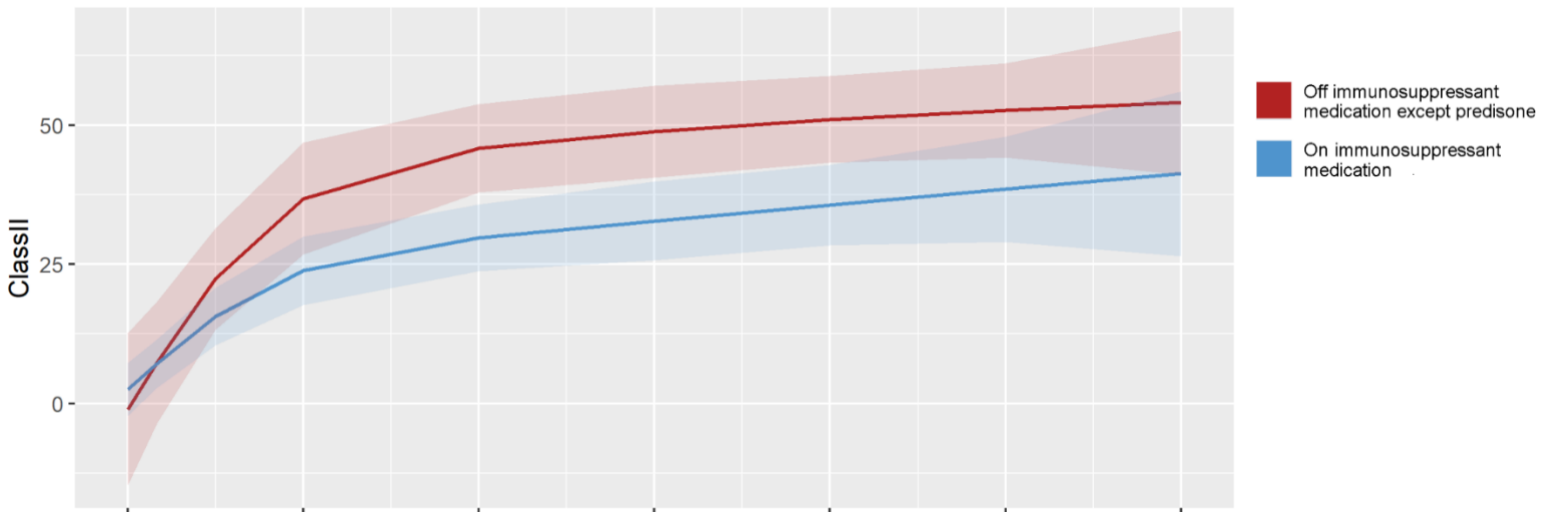

| Months | 0   | 6  | 12 | 18 | 24 | 30 | 36 |
|--------|-----|----|----|----|----|----|----|
| N      | 161 | 66 | 64 | 53 | 39 | 26 | 19 |
